# Supplementary material
Source: HighWire-hosted journal article supplement (https://jitc.bmj.com/content/10/2/e003526)

Supplementary Figure 4

A) i

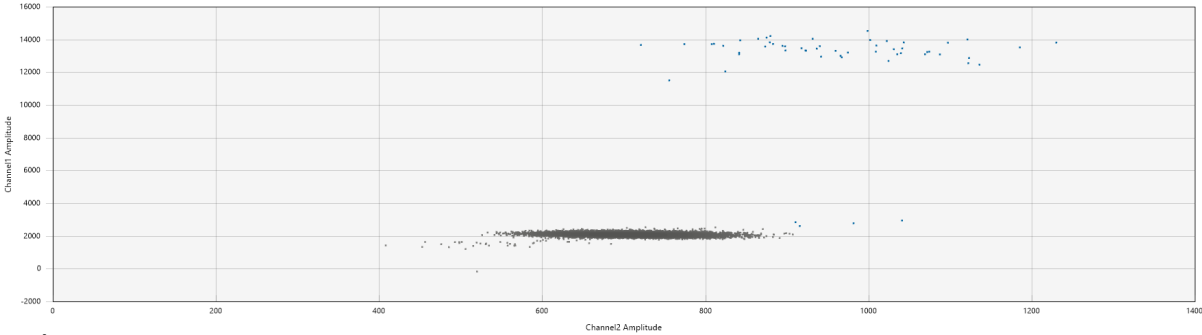

A) ii

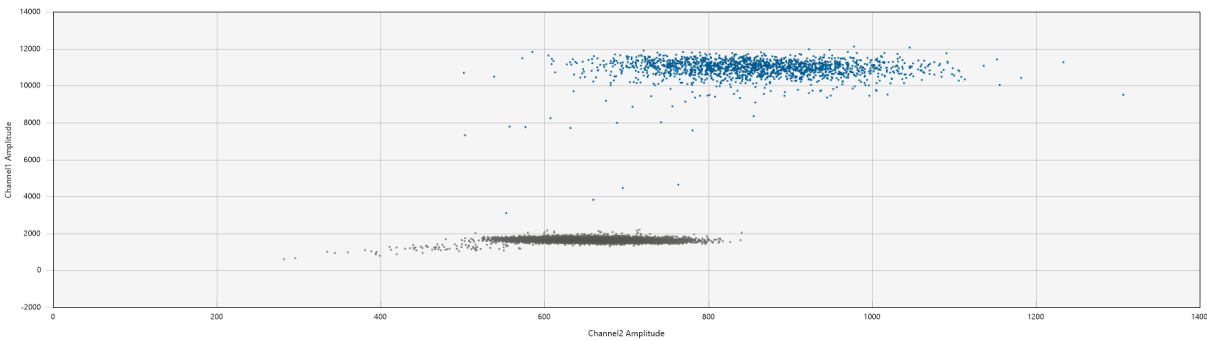

B) i

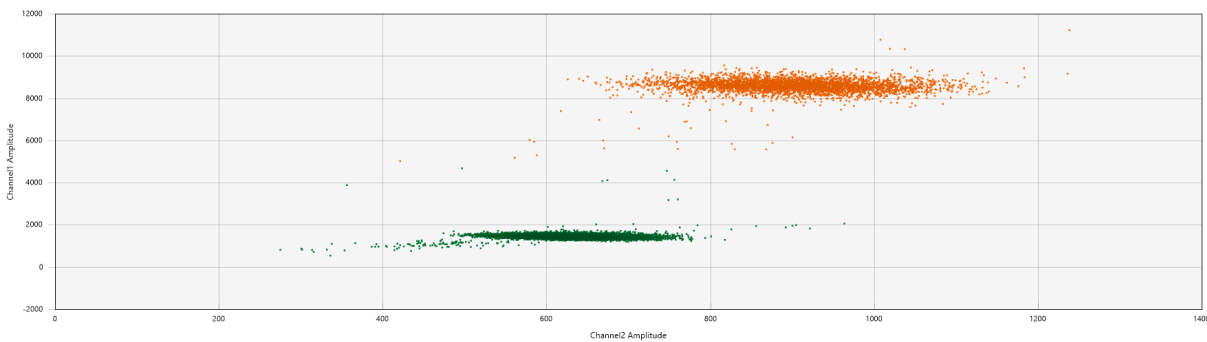

B) ii

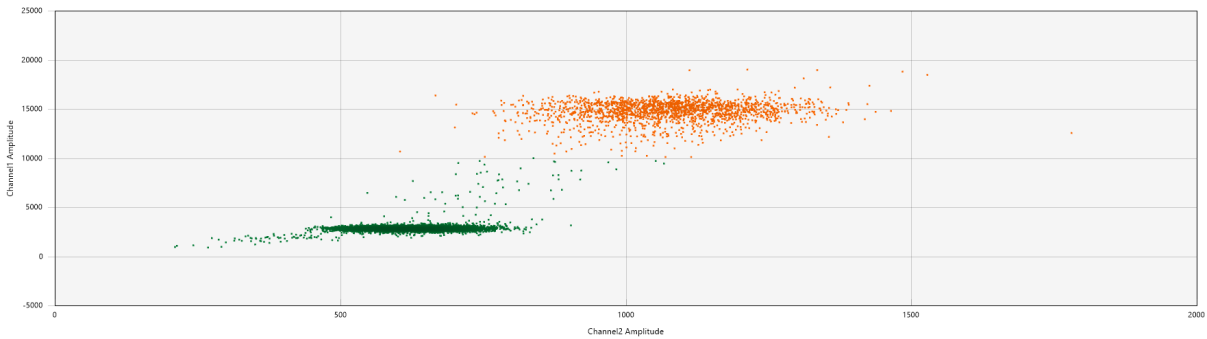

Supplementary Figure 4

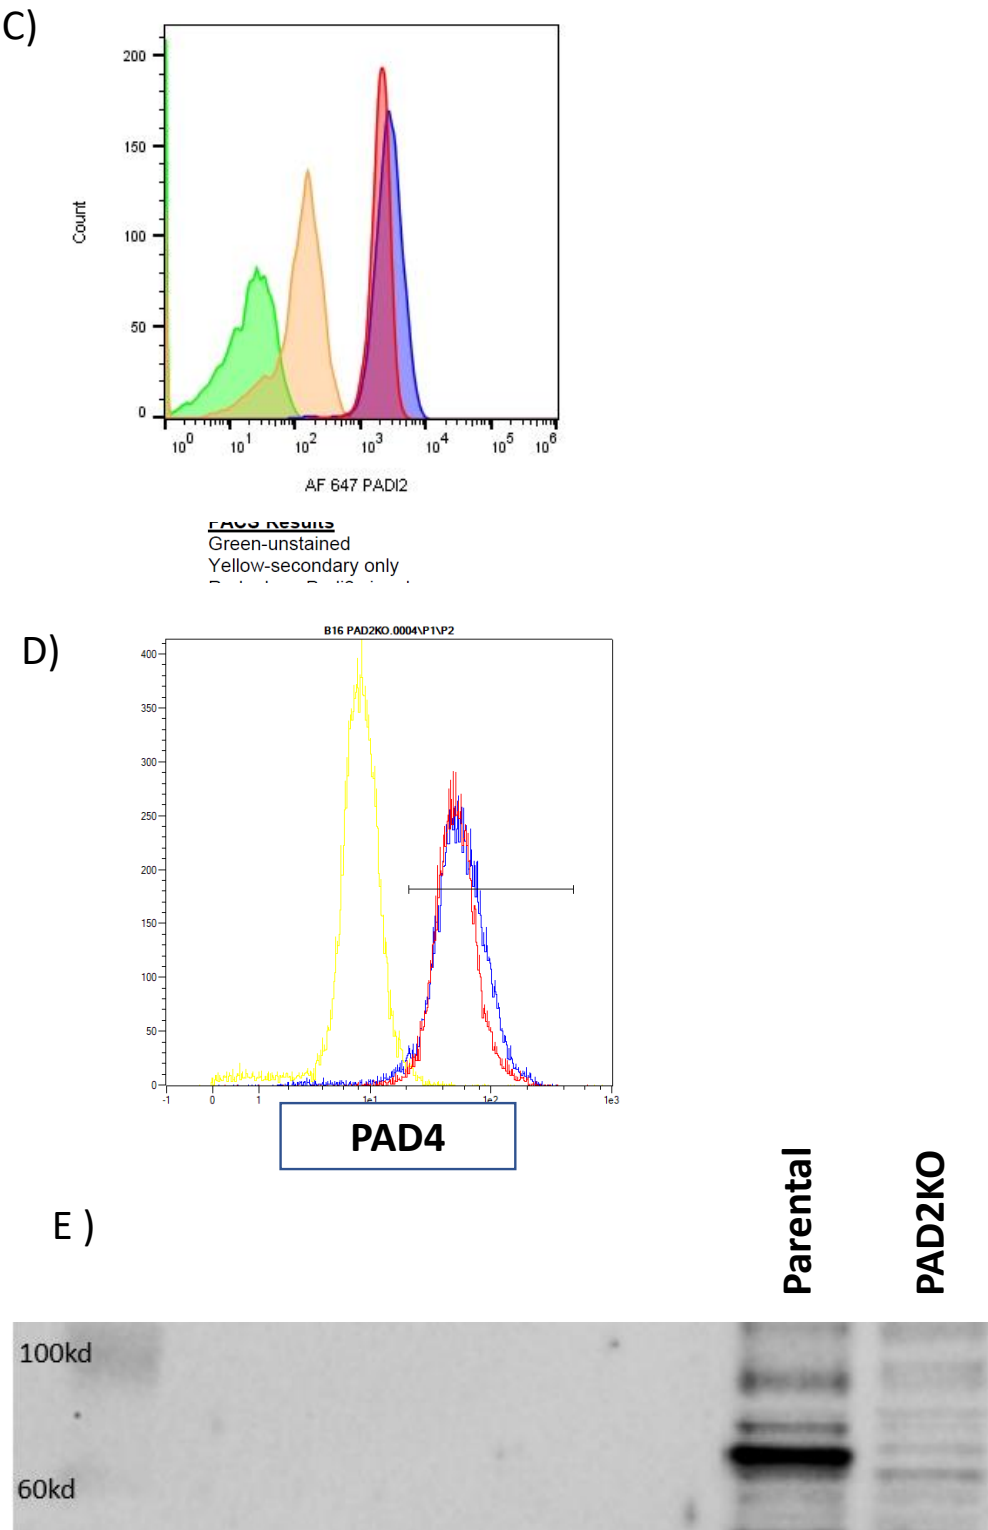

Supplement: inline-supplementary-material-5 [file inline-supplementary-material-5.pdf]
